# Supplementary material
Source: PubMed Central journal article supplement (PMC10898792)
Supplement: NIHMS1633773-supplement-Supp_mat.pdf [file NIHMS1633773-supplement-Supp_mat.pdf]

Supp. Table S1. Quantification of the rate and extent of SV exocytosis and endocytosis.

a

| constructs | CONTROL                                                 |         |                                |         |                                                        |         |
|------------|---------------------------------------------------------|---------|--------------------------------|---------|--------------------------------------------------------|---------|
|            | syp-pH exocytosis rate<br>(DF/F <sub>0</sub> ) / s (au) |         | syp-pH RP (% of total<br>pool) |         | syp-pH post-stim<br>endocytotic t <sub>decay</sub> (s) |         |
|            | mean ± SEM                                              | P to WT | mean ± SEM                     | P to WT | mean ± SEM                                             | P to WT |
| WT VAMP2   | 0.0164 ± 0.00105                                        |         | 38.10 ± 1.84%                  |         | 39.77 ± 2.96                                           |         |
| R56L       | 0.0126 ± 0.00086                                        | < 0.05* | 27.23 ± 1.37%                  | < 0.05* | 46.09 ± 4.92                                           | > 0.05  |
| G73W       | 0.0129 ± 0.00010                                        | < 0.05* | 27.58 ± 1.81%                  | < 0.05* | 37.34 ± 3.94                                           | > 0.05  |
| R56X       | 0.0170 ± 0.00077                                        | > 0.05  | 37.28 ± 1.23%                  | > 0.05  | 36.14 ± 3.36                                           | > 0.05  |

b

| constructs | 3,4 DAP                                                 |         |           |                                |         |           |                                                        |        |
|------------|---------------------------------------------------------|---------|-----------|--------------------------------|---------|-----------|--------------------------------------------------------|--------|
|            | syp-pH exocytosis rate<br>(DF/F <sub>0</sub> ) / s (au) |         |           | syp-pH RP (% of total<br>pool) |         |           | syp-pH post-stim<br>endocytotic t <sub>decay</sub> (s) |        |
|            | mean ± SEM                                              | P to WT | P to ctrl | mean ± SEM                     | P to WT | P to ctrl | mean ± SEM                                             | P      |
| WT VAMP2   | 0.0220 ± 0.00129                                        |         | < 0.05*   | 43.02 ± 1.00%                  |         | < 0.05*   | 38.49 ± 4.09                                           | > 0.05 |
| R56L       | 0.0216 ± 0.00118                                        | > 0.05  | < 0.05*   | 41.20 ± 2.15%                  | > 0.05  | < 0.05*   | 51.27 ± 5.03                                           | > 0.05 |
| G73W       | 0.0231 ± 0.00170                                        | > 0.05  | < 0.05*   | 43.27 ± 1.28%                  | > 0.05  | < 0.05*   | 46.16 ± 4.34                                           | > 0.05 |
| R56X       | 0.0230 ± 0.00086                                        | > 0.05  | < 0.05*   | 40.65 ± 1.40%                  | > 0.05  | > 0.05    | 35.99 ± 3.50                                           | > 0.05 |

Tables provide detailed quantification data for the exocytosis rate, recycling pool size (RP) and endocytosis rate of syp-pH, under conditions described in Figure 2 in the presence of (a) vehicle or (b) 3,4-DAP.
